# Supplementary material for: Mustard seed major allergen Sin a1 activates intestinal epithelial cells and also dendritic cells that drive type 2 immune responses
Source: Royal Society of Chemistry journal article supplement (doi:10.1039/d4fo01980f), 2024-01-01
Supplement: d4fo01980f1.pdf [file d4fo01980f1.pdf]

## Supplementary information

| Cytokine or immunoglobulin | Source      | Cat Number  |
|----------------------------|-------------|-------------|
| IFN $\gamma$               | Invitrogen  | 88-7316-88  |
| IL-4                       | Invitrogen  | 88-7046-88  |
| IL-8                       | Invitrogen  | 88-8086-88  |
| IL-10                      | Invitrogen  | 88-7106-88  |
| IL-12p70                   | Invitrogen  | 88-7126-88  |
| IL-13                      | Invitrogen  | 88-7439-88  |
| IL-15                      | Biolegend   | 435104      |
| IL-17                      | Invitrogen  | 88-7176-88  |
| IL-25                      | R&D systems | DY1258-05   |
| IL-33                      | R&D systems | DY3625B     |
| TGF $\beta$                | Invitrogen  | 88-50390-88 |
| TNF $\alpha$               | Invitrogen  | 88-7346-88  |
| TSLP                       | Invitrogen  | 88-7497-88  |
| IgE                        | Invitrogen  | 88-50610-88 |
| IgG                        | Invitrogen  | 88-50550-88 |
| CCL20                      | R&D systems | DY360       |
| CCL22                      | R&D systems | DY336       |

**Table 1 Supplementary. ELISA kits employed to determine cytokine concentrations.**

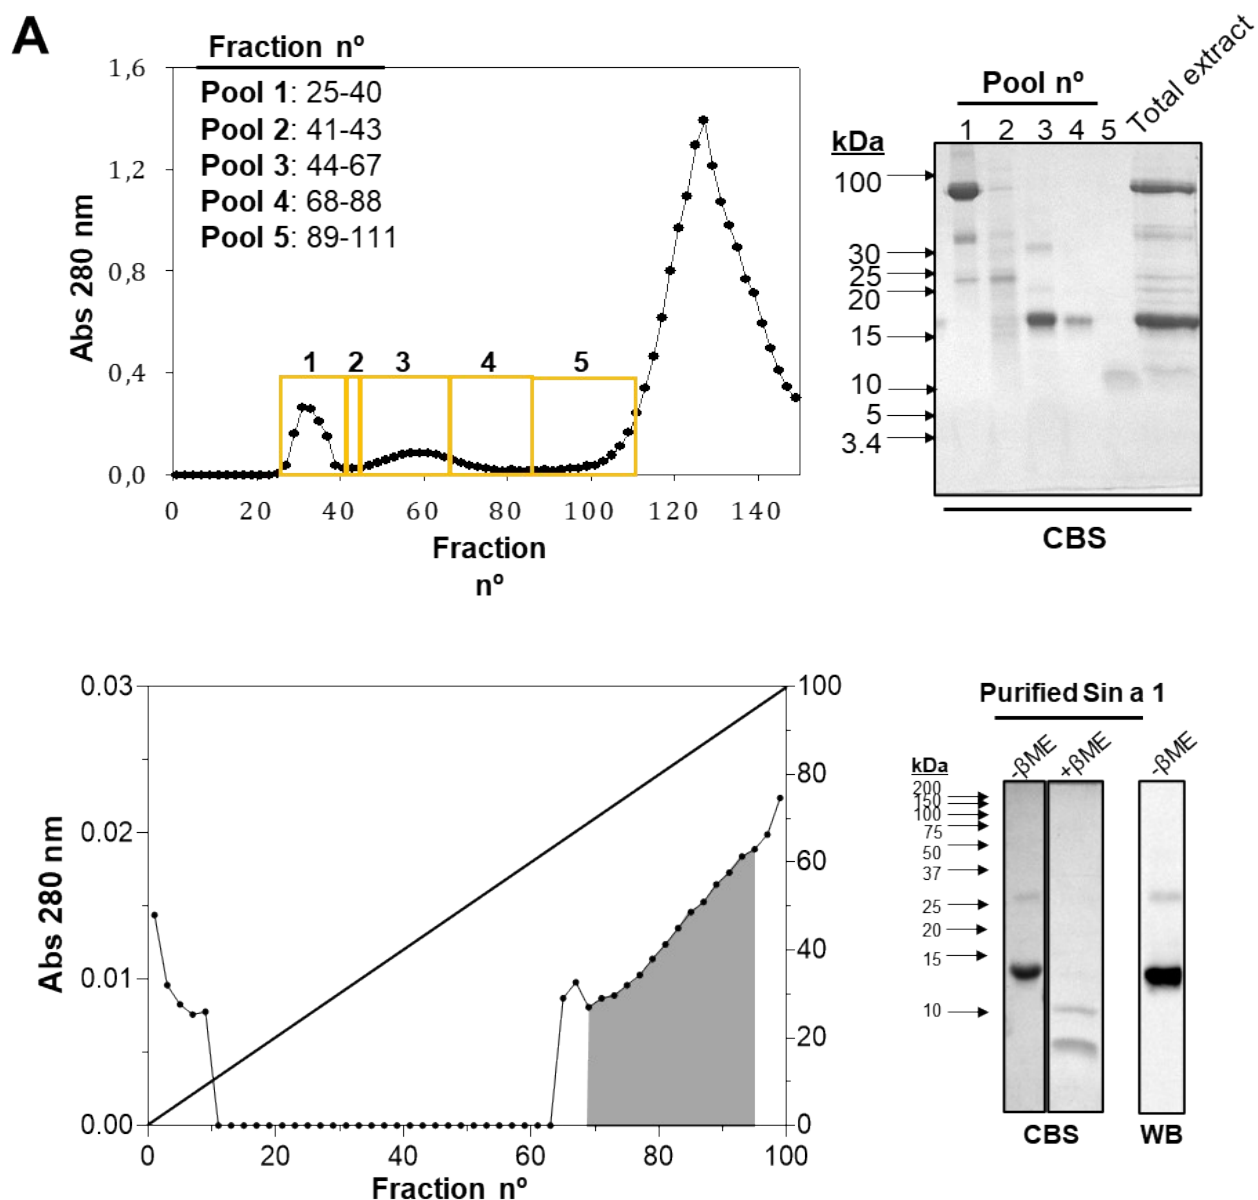

**Supplementary Figure 1. Sin a 1 isolation from yellow mustard seed extract.** Two consecutive chromatographic steps were employed for Sin a 1 isolation from total protein mustard seed extract: a size exclusion chromatography (A), and an ion-exchange chromatography of pools 3 and 4 from previous step (B).

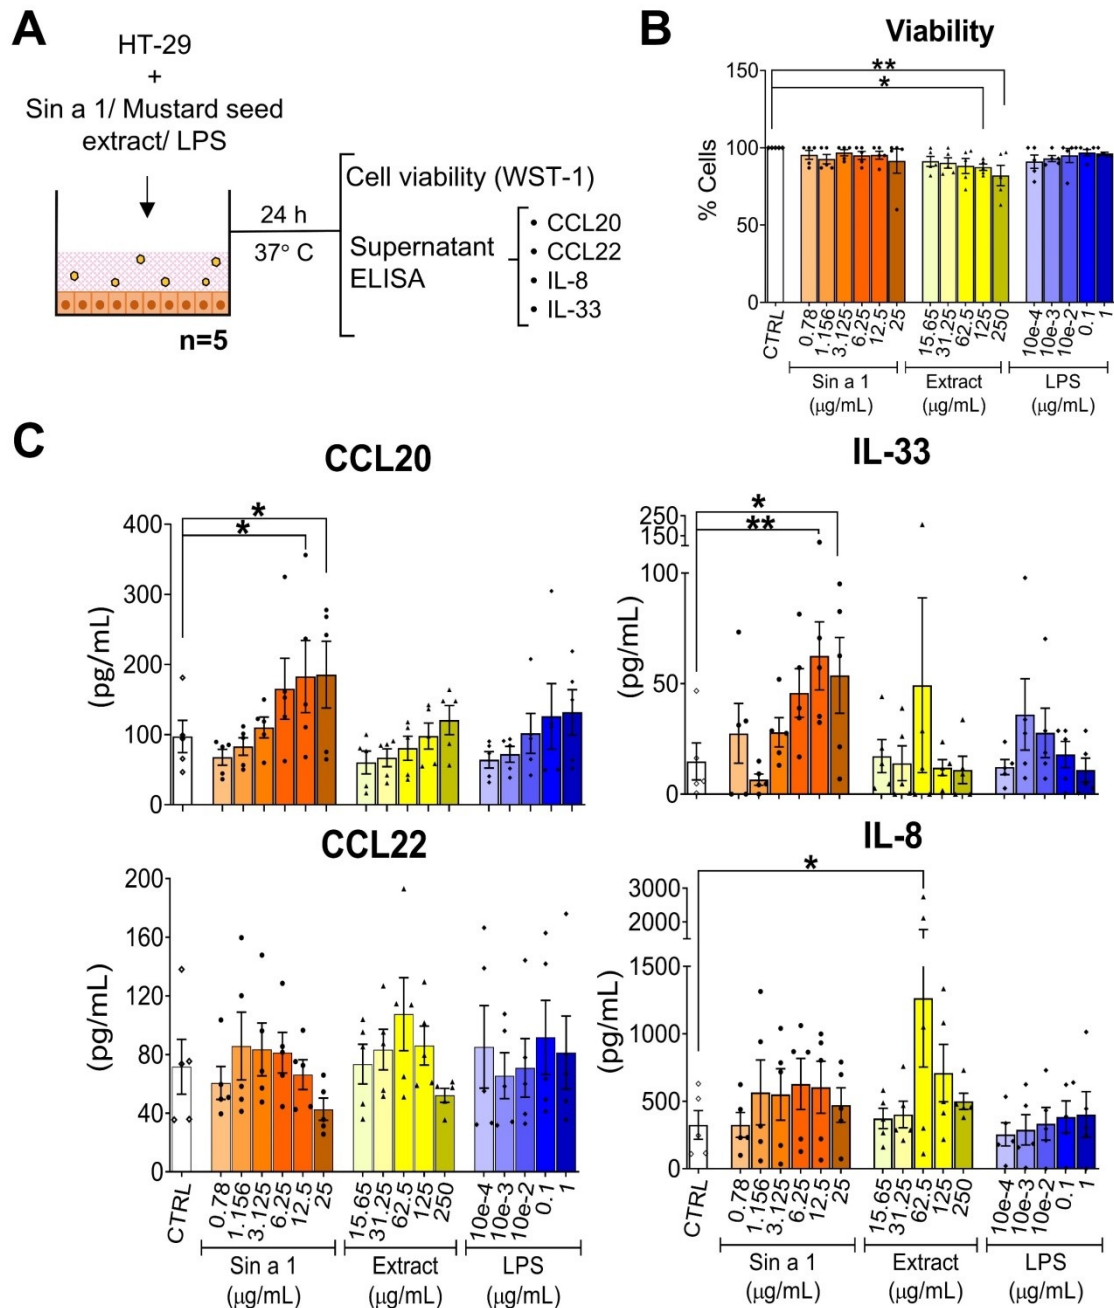

**Supplementary Figure 2. Exposure of HT-29 to Sin a 1, mustard seed extract and LPS.** (A) HT-29 cell line was seeded in flat-bottom 48 well-plates and incubated with increasing doses of Sin a 1, total mustard seed or LPS, for 24 h (n=5 independent experiments). After that, cell viability was determined using WST-1 reagent (B), while cell supernatants were employed for cytokine analysis by ELISA. (C) Cytokine profile of cell supernatants after incubation with Sin a 1. Data was analysed by one-way ANOVA and Bonferroni post hoc test with selected pairs, mean  $\pm$  SEM \*  $p<0.05$ , \*\*  $p<0.01$ , \*\*\*  $p<0.001$ ).

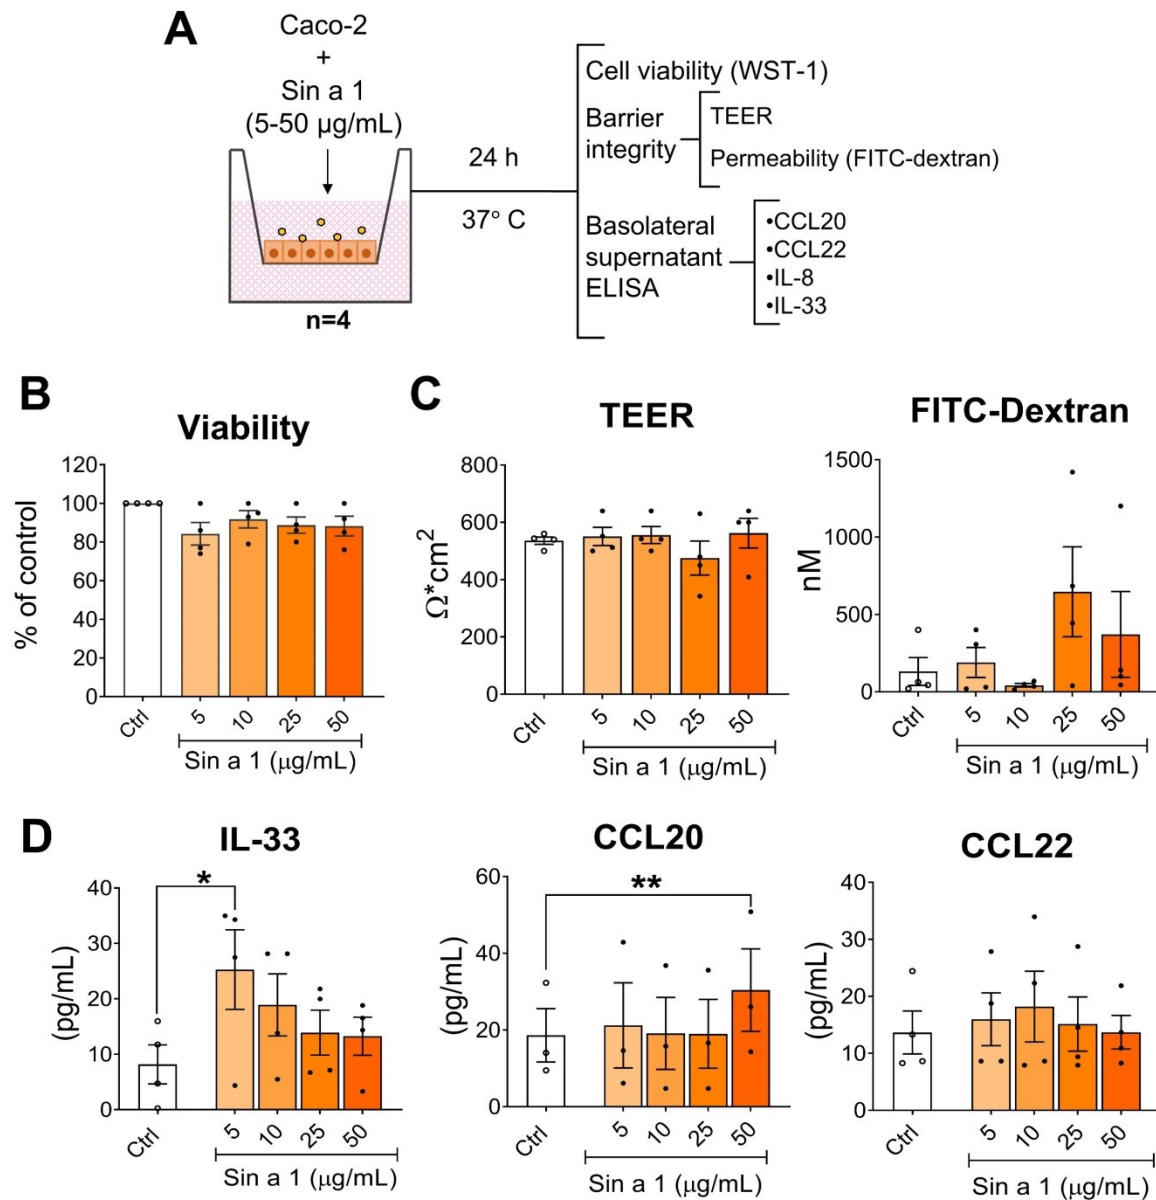

**Supplementary Figure 3. Caco-2 activation in presence of Sin a 1.** (A) Caco-2 cell line was seeded in 12 well transwell insert plates and, once confluence was reached cells were polarized for 14-21 days, after which they were incubated with increasing doses of the mustard seed major allergen, Sin a 1, for 24 h (n=4 independent experiments). After that, cell viability (B), barrier integrity (C) was determined, and cytokine analysis was performed by ELISA (D) were performed. Data was analysed by one-way ANOVA and Bonferroni post hoc test with selected pairs, mean  $\pm$  SEM \* p<0.05, \*\* p<0.01, \*\*\* p<0.001).

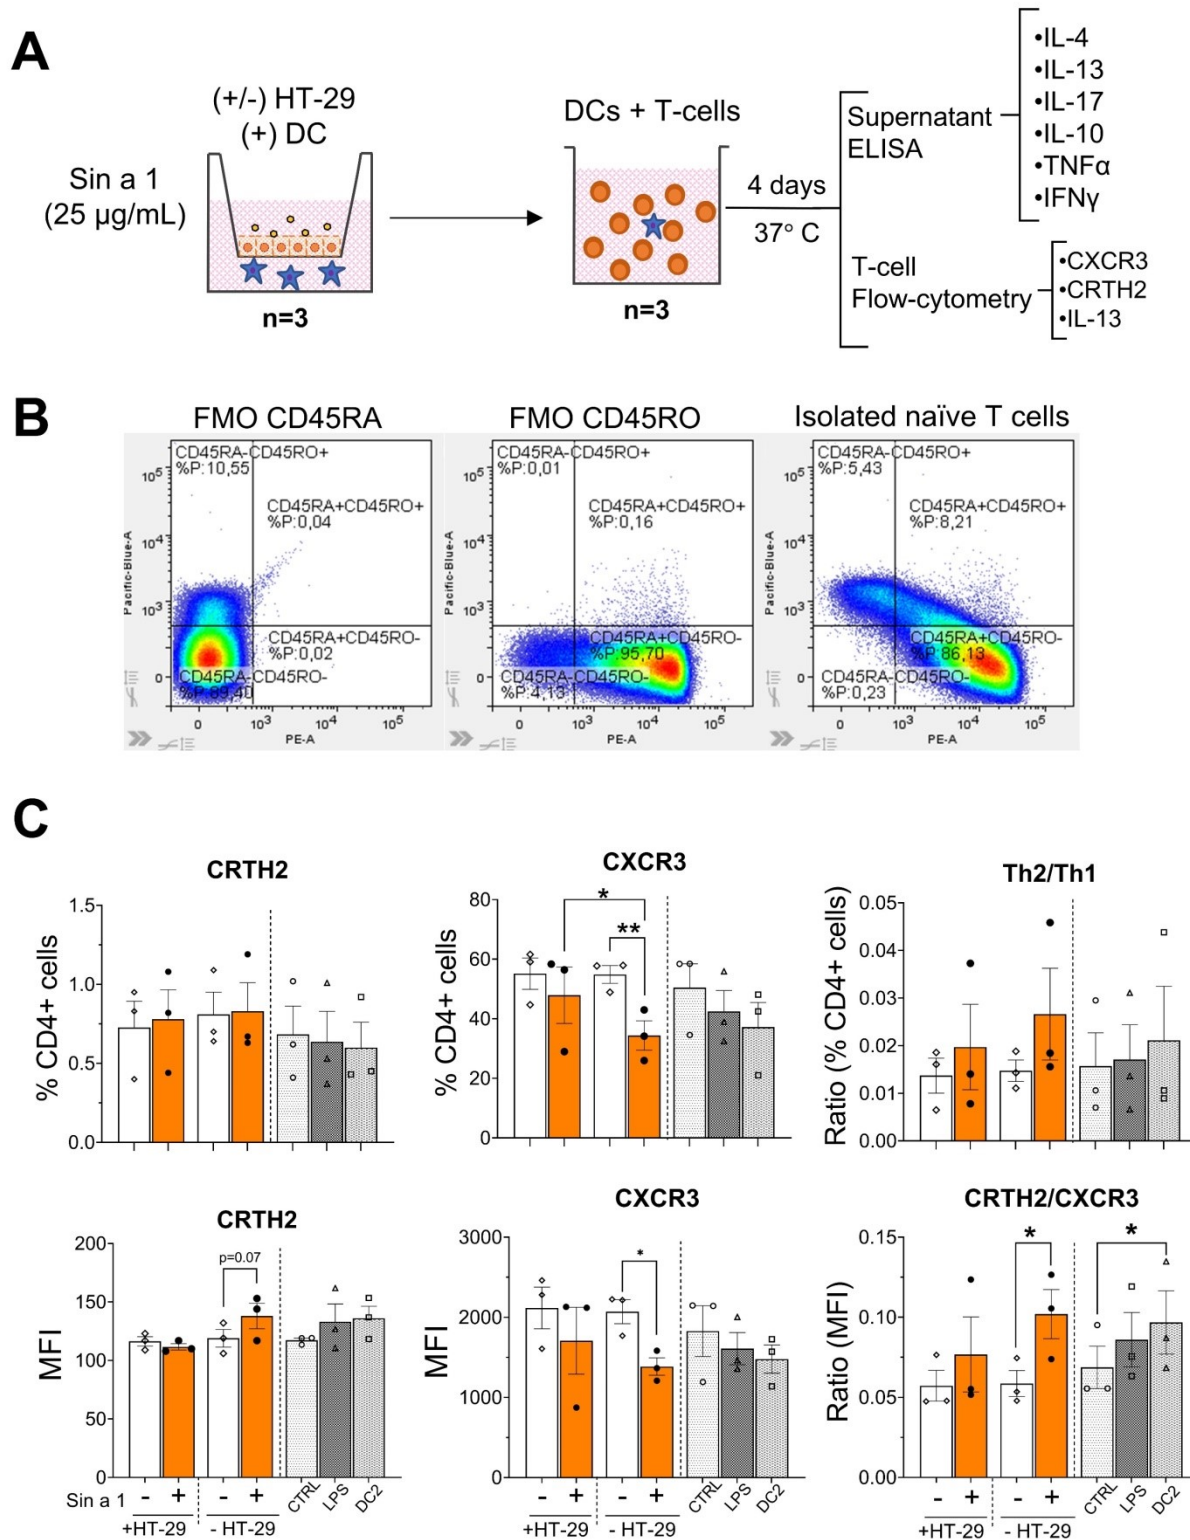

**Supplementary Figure 4. Co-culture of Sin a 1 primed IEC-DC or DC with naïve T-cells results in a type-2 immune response.** (A) DC from the previous step were cocultured with allogenic naïve T-cells for 96 h (n=3 independent donors). Naïve T-cell isolation (CD45RA+RO-) was confirmed by flow cytometry after MACS isolation step (B), and T-cell phenotype was determined after co-culture with DC (CRTH2 marker Th2 cells, CXCR3, marker for Th1 cells; % cells, median MFI and ratio Th2/Th1) (C). Controls were LPS and DC2 type cytokine mix (DC2) matured DC. Data was analysed by one-way ANOVA and Bonferroni post hoc test with selected pairs, mean  $\pm$  SEM (\*  $p < 0.05$ , \*\*  $p < 0.01$ , \*\*\*  $p < 0.001$ ).

**A**

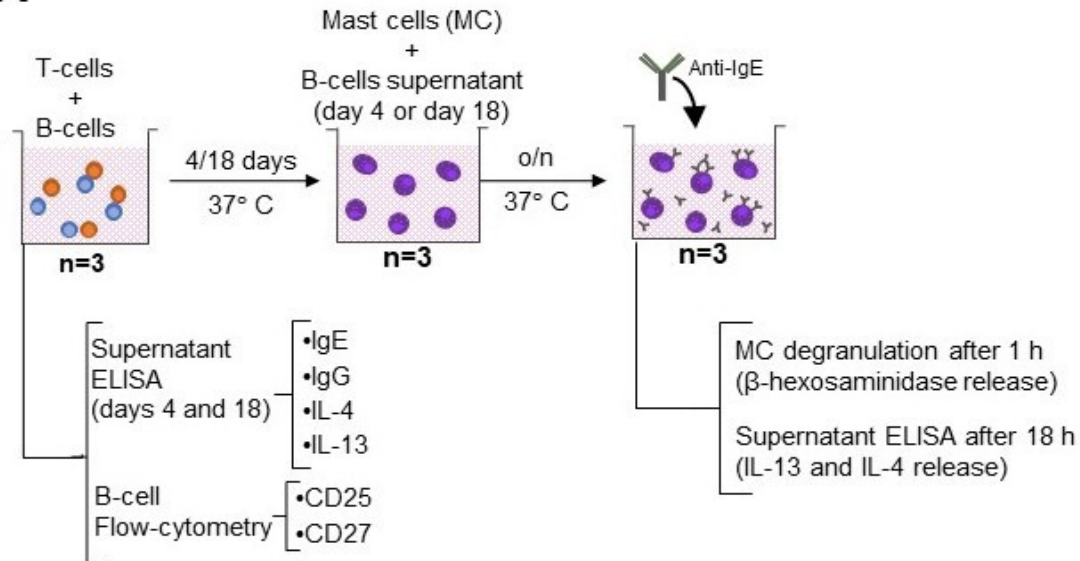

**B**

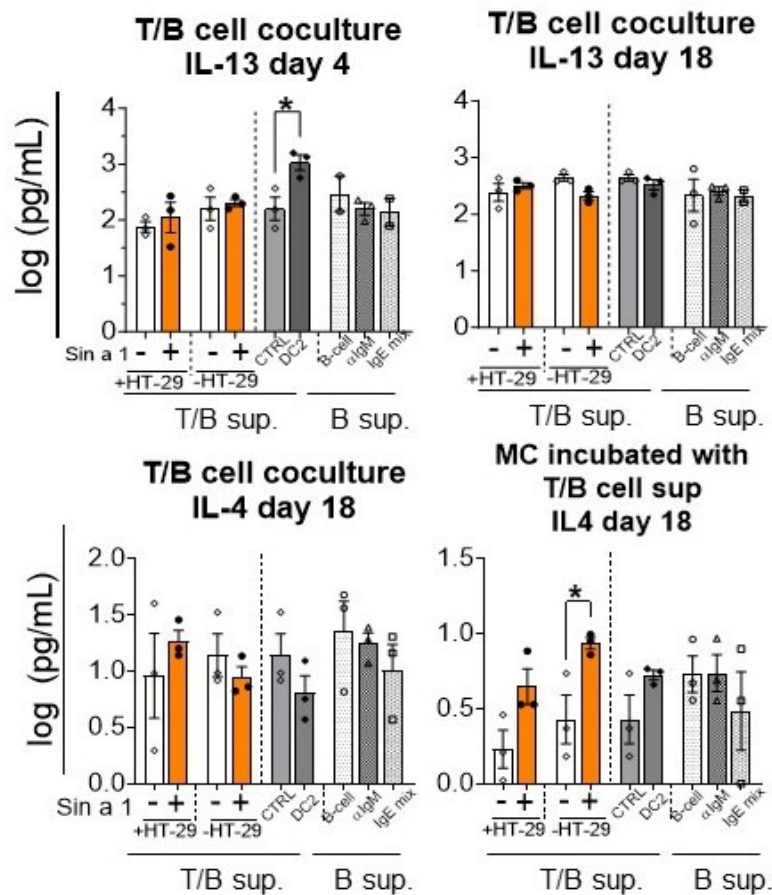

**Supplementary Figure 5. T/B-cell cocultures and MC exposed to B-cell supernatants (n=3 independent donors) (A).** IL-4 and IL-13 concentrations were determined after 4 days (not-detected) and 18 days in the supernatant of the autologous T/B-cell coculture, and in supernatants from MC exposed to these supernatants (only IL-4 was detectable when exposed to 18 days supernatant) (B). Controls are B-cells alone, medium-exposed (B-cell), anti-IgM exposed (algM), or anti-IgM+antiCD40+IL-4 (IgE mix). Data was analysed by one-way ANOVA and Bonferroni post hoc test with selected pairs, or by paired t-test for CTRL vs DC2, mean  $\pm$  SEM (\*  $p < 0.05$ , \*\*  $p < 0.01$ , \*\*\*  $p < 0.001$ ).

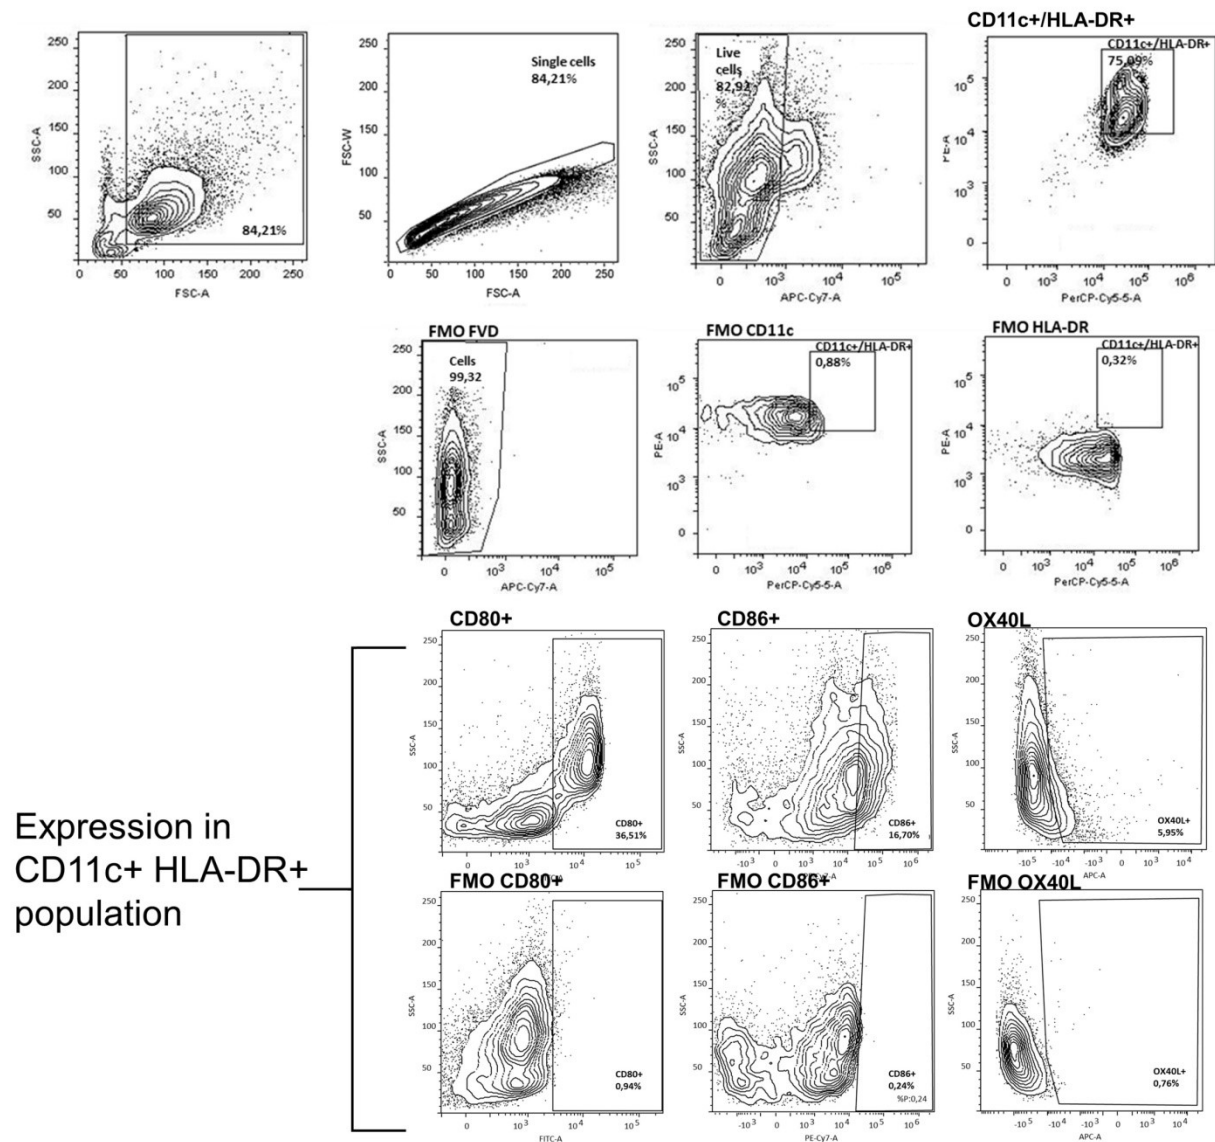

**Supplementary Figure 6. Gating strategy of moDC.** First, CD11c<sup>+</sup>/HLA-DR<sup>+</sup> DC were selected within the live cell population. Then, CD80, CD86 and OX40L expression markers were analysed within the double-positive DC population. FMO (isotype) controls of each marker are shown to confirm specificity of the obtained results.

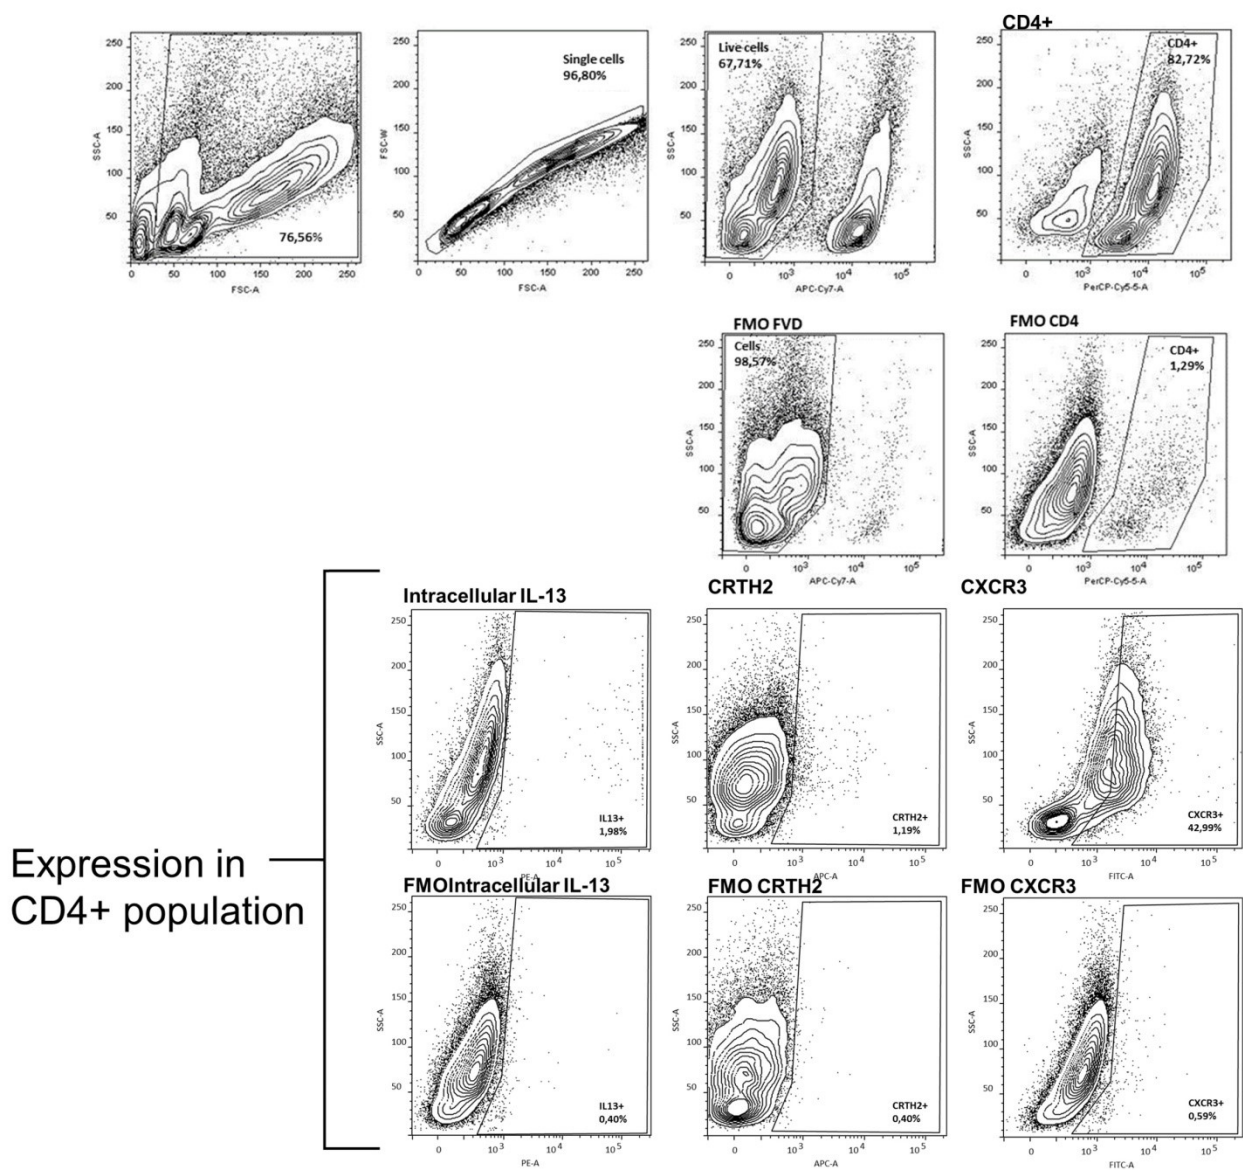

**Supplementary Figure 7. Gating strategy of T cells. First, CD4+ (T helper) were selected within the viable cell population. Then intracellular IL-13, CRTH2 and CXCR3 expression markers were analysed within the CD4+ population. FMO (isotype) controls of each marker are shown to confirm specificity of the obtained results**

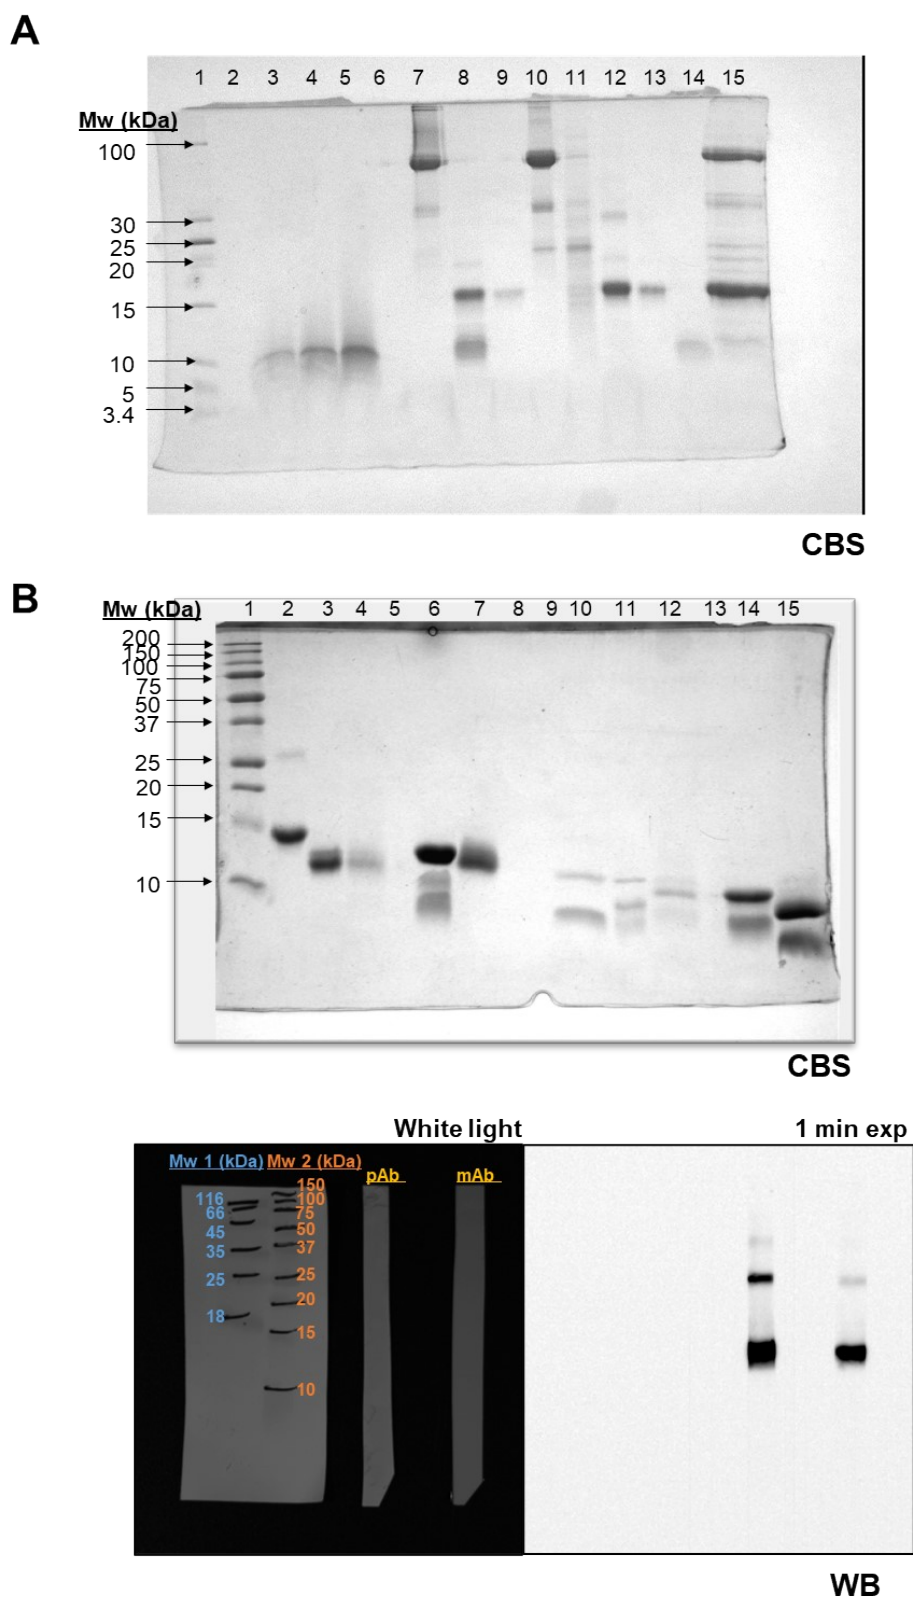

**Supplementary Figure 8. Originals of SDS-PAGE and western blotting.** **A.** SDS-PAGE stained in CBS of pools obtained from size-exclusion chromatography (lanes 10-14) and total protein extract of yellow mustard seed. Lanes 2-13 correspond to other proteins no related to the present study. **B.** SDS-PAGE in CBS of 2S albumins from different sources under non-reducing (lanes 2-7) and reducing (lanes 10-15) conditions. Sin a 1 was loaded in lanes 2 and 8. Under CBS, original pictures of western blotting in non-reducing conditions of Sin a 1 using a policlonal (pAb) and a monoclonal (mAb) antibody.
